# Supplementary material for: Remodeling of lumbar motor circuitry remote to a thoracic spinal cord injury promotes locomotor recovery
Source: eLife journal article supplement (doi:10.7554/elife.39016), 2018-09-12
Supplement: supp [file elife_poa_e39016_Source_data_1.xlsx]

## Sheet: Statistical Report
Figures
FIGURE NUMBER	N NUMBER	TEST USED	P VALUE	DEGREES OF FREEDOM & F/t/z/R/ETC VALUE	POST-HOC TEST	LOCATION IN ARTICLE (LINE NUMBER)
Fig. 1B	9	mean ± SD			N/A	90
Fig. 1E	8	t test	p=0.000	t=9.967	N/A	96
Fig. 1F	36	t test	p=0.000	t=4.273	N/A	97
Fig. 1G	3	1way ANOVA	5d p=0.000; 9d p=0.0003	5d：F=104.4；9d: F= 42.17	Tukey's Multiple Comparison Test	102
Fig. 3D	6	t test	p=0.000	t=6.695	N/A	156
Fig. 3E	3	t test	p=0.000	t=27.79	N/A	159
Fig. 4A time	10	two-way ANOVA	p=0.000	F=245.2	Tukey's Multiple Comparison Test	174
Fig. 4A column factor	10	two-way ANOVA	p=0.000	F=298.3	Tukey's Multiple Comparison Test	174
Fig. 4B	10	1way ANOVA	p=0.000	F=58.28	Tukey's Multiple Comparison Test	174
Fig. 4C 3w	10	1way ANOVA	p=0.000	F=141.9	Tukey's Multiple Comparison Test	177
Fig. 4C 5w	10	1way ANOVA	p=0.000	F=28.16	Tukey's Multiple Comparison Test	177
Fig. 4D 5w	10	1way ANOVA	p=0.000	F=28.16	Tukey's Multiple Comparison Test	177
Fig. 4F	10	1way ANOVA	0.0001	F=9.19	Tukey's Multiple Comparison Test	179
Fig. 4G	10	1way ANOVA	p=0.000	F=15.67	Tukey's Multiple Comparison Test	180
Fig. 4H	10	1way ANOVA	0.0008	F=9.45	Tukey's Multiple Comparison Test	180
Fig. 5B		chi-square test	0.0011	χ2=0.833	N/A	184
Fig. 5G ER	6	1way ANOVA	p=0.000	F=15.67	Tukey's Multiple Comparison Test	186
Fig. 5G LR	6	t test	p=0.000	t=7.630	N/A	187
Fig. 5H ER	6	1way ANOVA	p=0.000	F=16.55	Tukey's Multiple Comparison Test	187
Fig. 5H LR	6	t test	0.0013	t=3.993	N/A	188
Fig. 6B 0-60	8	1way ANOVA	0.0037	F=61.07	Tukey's Multiple Comparison Test	213
Fig. 6B 60-120	8	1way ANOVA	0.0009	F=11.59	Tukey's Multiple Comparison Test	213
Fig. 6B 300-360	8	1way ANOVA	p=0.000	F=24.93	Tukey's Multiple Comparison Test	214
Fig. 6C	6	1way ANOVA	p=0.000	F=13.48	Tukey's Multiple Comparison Test	209
Fig. 6D	12	Linear reg.	p=0.000	r=0.87	N/A	215
Fig. 6E	12	Linear reg.	0.0006	r=0.711	N/A	216
Fig. 7D	6	1way ANOVA	0.0062	F=7.59	Tukey's Multiple Comparison Test	228
Fig. 7E	6	1way ANOVA	0.0034	F=8.501	Tukey's Multiple Comparison Test	238
Fig. 7F	6	1way ANOVA	0.0024	F=8.896	Tukey's Multiple Comparison Test	252
Fig. 8B	8	1way ANOVA	0.0003	F=12.46	Tukey's Multiple Comparison Test	269
Fig. 8C	12	1way ANOVA	p=0.000	F=20.83	Tukey's Multiple Comparison Test	270
Fig. 8D	12	1way ANOVA	0.0032	F=7.658	Tukey's Multiple Comparison Test	271
Fig. 9C	6	1way ANOVA	p=0.000	F=29.96	Tukey's Multiple Comparison Test	281
Fig. 9D	10	1way ANOVA	p=0.000	F=35.15	Tukey's Multiple Comparison Test	284
Fig. 9E	8	1way ANOVA	0.634	F=0.465	Tukey's Multiple Comparison Test	286
Supplementary Figures
FIGURE NUMBER	N NUMBER	TEST USED	P VALUE	DEGREES OF FREEDOM & F/t/z/R/ETC VALUE	POST-HOC TEST	LOCATION IN ARTICLE (LINE NUMBER)
s Fig. 2D	5	t test	0.0004	t=5.826	N/A	125
s Fig. 2E	5	t test	0.0007	t=6.324	N/A	126
s Fig. 2I	5	t test	0.3182	t=1.065	N/A	127
s Fig. 2J	5	t test	0.4971	t=0.711	N/A	130
s Fig. 2K	5	t test	0.0011	t=5.282	N/A	132
s Fig. 2L 1d	6	t test	0.0033	t=3.841	N/A	134
s Fig. 2L 7d	6	t test	0.0646	t=2.86	N/A	135
s Fig. 2L 14d	6	t test	0.2094	t=1.342	N/A	135
s Fig. 5B	8	1way ANOVA	0.6058	F=0.541	Tukey's Multiple Comparison Test	201
s Fig. 5C	8	1way ANOVA	0.6034	F=0.517	Tukey's Multiple Comparison Test	200
s Fig. 5D	8	1way ANOVA	0.2166	F=1.647	Tukey's Multiple Comparison Test	202
s Fig. 7D	12	t test	0.011	t=2.63	N/A	266
s Fig. 8C	7	t test	0.5038	t=0.689	N/A	296
s Fig. 8D	6	t test	0.9449	t=0.073	N/A	297
s Fig. 8E	6	t test	0.8038	t=0.255	N/A	299
